# Supplementary material
Source: PubMed Central journal article supplement (PMC5073003)
Supplement: NIHMS808014-supplement-01.pdf [file NIHMS808014-supplement-01.pdf]

32. Huntington Scott; Shah NE, Andrew; and Loren, AW. The Impact of Marital and Socioeconomic Status on Outcomes of Patients with Acute Promyelocytic Leukemia. Blood 2014;124 1282 - 1282
33. Armand P, Gibson CJ, Cutler C, Ho VT, Koreth J, Alyea EP, Ritz J, Sorrow ML, Lee SJ, Deeg HJ, Storer BE, Appelbaum FR, Antin JH, Soiffer RJ, Kim HT. A disease risk index for patients undergoing allogeneic stem cell transplantation. Blood 2012;120:905-913.
34. Sorrow ML, Maris MB, Storb R, Baron F, Sandmaier BM, Maloney DG, Storer B. Hematopoietic cell transplantation (HCT)-specific comorbidity index: a new tool for risk assessment before allogeneic HCT. Blood 2005;106:2912-2919.

Figure Titles and Legends:

Legend for Figure 1: OS: overall survival; VLD: very long delay; SD: short delay; LD: long delay

Supplemental Figure 1: ECOG 2993/MRC UKALLXII Schema

Supplementary Figure 1 Legend: MUD: matched unrelated donor; SIB: matched sibling donor; Ph+: Philadelphia chromosome positive; HD MTX: high dose methotrexate intensification

Supplemental Figure 2: Patient Eligibility for Analysis

Supplemental Figure 3 Legend: EFS: Event free survival; VLD: very long delay; SD: short delay; LD: long delay
